# Supplementary material for: Why patients in specialist palliative care in-patient settings are at high risk of falls and falls-related harm: A realist synthesis
Source: PubMed Central journal article supplement — Palliat Med. 2022 Nov 2;36(10):1469–82. doi: 10.1177/02692163221127808 (PMC9749013; doi:10.1177/02692163221127808), 2022-11-02
Supplement: sj-pdf-1-pmj-10.1177_02692163221127808.pdf [file sj-pdf-1-pmj-10.1177_02692163221127808.pdf]

**Supplementary material 1 – Search String Process**

| Theme                                                  | Search Strings                                                                                                                                                                                                                                                                                                                                                                                                                            |
|--------------------------------------------------------|-------------------------------------------------------------------------------------------------------------------------------------------------------------------------------------------------------------------------------------------------------------------------------------------------------------------------------------------------------------------------------------------------------------------------------------------|
| <p><b>1. Medication as a risk factor for falls</b></p> | <p><b><u>AMED</u></b><br/>           Fall* OR Collaps* OR Trip* OR Slip* OR Accident OR safety OR Incident<br/>           AND<br/>           Palliative OR hospice OR cancer OR “end of life” OR terminal OR dying OR death<br/>           AND<br/>           Medicine OR Medication OR Pharmacy OR Polypharmacy OR Drugs OR Opiate* OR Benzod* OR Neuroleptic OR Sedation<br/> <b>626 results screened</b><br/> <b>(46 selected)</b></p> |
|                                                        | <p><b><u>Health Research Premium Collection</u></b><br/>           AB(slip* OR trip* OR fall*) AND TI(Palliative OR hospice) AND AB(Medicine OR Medication OR Pharmacy OR Polypharmacy OR Drugs OR Opiate* OR Benzod* OR Neuroleptic OR Sedation)<br/> <b>95 results screened</b><br/> <b>(18 selected)</b></p>                                                                                                                           |
|                                                        | <p><b><u>CINAHL</u></b><br/>           TI ( Fall* OR Collaps* OR Trip* OR Slip* OR Accident OR safety OR Incident ) AND TI ( Palliative OR hospice OR“end of life” OR terminal OR dying OR death ) AND AB ( Medicine OR Medication OR Pharmacy OR Polypharmacy OR Drugs OR Opiate* OR Benzod* OR Neuroleptic OR Sedation )<br/> <b>56 results screened</b><br/> <b>(13 selected)</b></p>                                                  |
| <p><b>Total</b></p>                                    | <p><b>Selected papers – 77</b></p>                                                                                                                                                                                                                                                                                                                                                                                                        |

**Supplementary material 1 – Search String Process**

|                                                                    |                                                                                                                                                                                                                                                                                                                                                                                                                                                                                                     |
|--------------------------------------------------------------------|-----------------------------------------------------------------------------------------------------------------------------------------------------------------------------------------------------------------------------------------------------------------------------------------------------------------------------------------------------------------------------------------------------------------------------------------------------------------------------------------------------|
| <p><b>2. Age and functionality as a risk factor for a fall</b></p> | <p><b><u>AMED</u></b><br/> Palliative OR hospice OR cancer OR “end of life” OR terminal OR dying OR death AND Fall* OR Collaps* OR Trip* OR Slip* AND Age OR Senior OR Elderly OR Geriatric OR Frail* OR Functional stat* OR Performance OR Karnofsky OR Frailty OR Barthel OR CFS OR Capability OR Disability OR Mobility OR Ambulat* OR ADLs OR Transfer OR Weightbearing<br/> <b>157 results screened</b><br/> <b>(13 selected)</b></p>                                                          |
|                                                                    | <p><b><u>Health Research Premium Collection</u></b><br/> ab(slip* OR trip* OR fall*) AND ti(Palliative OR hospice) AND ab(Age OR Senior OR Elderly OR Geriatric OR Frail* OR Functional stat* OR Performance OR Karnofsky OR Frailty OR Barthel OR CFS OR Capability OR Disability OR Mobility OR Ambulat* OR ADLs OR Transfer OR Weightbearing)<br/> <b>157 results screened</b><br/> <b>(39 selected)</b></p>                                                                                     |
|                                                                    | <p><b><u>CINAHL</u></b><br/> TI ( Fall* OR Collaps* OR Trip* OR Slip* OR Accident OR safety OR Incident ) AND TI ( Palliative OR hospice OR cancer OR “end of life” OR terminal OR dying OR death ) AND TI ( Age OR Senior OR Elderly OR Geriatric OR Frail* OR Functional stat* OR Performance OR Karnofsky OR Frailty OR Barthel OR CFS OR Capability OR Disability OR Mobility OR Ambulat* OR ADLs OR Transfer OR Weightbearing )<br/> <b>162 results screened</b><br/> <b>(10 selected)</b></p> |
| <p>Total</p>                                                       | <p><b>Selected papers – 62</b></p>                                                                                                                                                                                                                                                                                                                                                                                                                                                                  |

**Supplementary material 1 – Search String Process**

|                                                                        |                                                                                                                                                                                                                                                                                                                                                                                                                                                                                                                                                                                                                   |
|------------------------------------------------------------------------|-------------------------------------------------------------------------------------------------------------------------------------------------------------------------------------------------------------------------------------------------------------------------------------------------------------------------------------------------------------------------------------------------------------------------------------------------------------------------------------------------------------------------------------------------------------------------------------------------------------------|
| <p><b>3. Medical history/diagnosis as a risk factor for a fall</b></p> | <p><b><u>AMED</u></b><br/> Palliative OR hospice OR cancer OR “end of life” OR terminal OR dying OR death AND Fall* OR Collaps* OR Trip* OR Slip* AND Disease OR Diagnosis OR History OR Cancer OR Non-Cancer OR Malignant OR Non-malignant OR Neoplasm OR Tumour OR Metastatic OR Advanced OR Secondary OR Dementia OR Cognitive OR Delirium OR Mental OR Confus* OR Agitat* OR Co-morbidity OR Concurrent illness OR Frailty OR Continen* OR Incontinence OR Bathroom OR Toileting OR Elimination<br/> <b>263 results screened</b><br/> <b>(13 selected)</b></p>                                                |
|                                                                        | <p><b><u>Health Research Premium Collection</u></b><br/> ti(Palliative OR hospice OR "end of life" OR terminal OR dying OR death) AND ti(Fall* OR Collaps* OR Trip* OR Slip*) AND ab(Disease OR Diagnosis OR History OR Malignant OR Non-malignant OR Neoplasm OR Tumour OR Metastatic OR Advanced OR Secondary OR Dementia OR Cognitive OR Delirium OR Mental OR Confus* OR Agitat* OR Co-morbidity OR Concurrent illness OR Frailty OR Continen* OR Incontinence OR Bathroom OR Toileting OR Elimination)<br/> <b>404 results screened</b><br/> <b>(14 selected)</b></p>                                        |
|                                                                        | <p><b><u>CINAHL</u></b><br/> TI ( Fall* OR Collaps* OR Trip* OR Slip* OR Accident OR safety OR Incident ) AND TI ( Palliative OR hospice OR “end of life” OR terminal OR dying OR death ) AND AB ( Disease OR Diagnosis OR History OR Cancer OR Non-Cancer OR Malignant OR Non-malignant OR Neoplasm OR Tumour OR Metastatic OR Advanced OR Secondary OR Dementia OR Cognitive OR Delirium OR Mental OR Confus* OR Agitat* OR Co-morbidity OR Concurrent illness OR Frailty OR Continen* OR Incontinence OR Bathroom OR Toileting OR Elimination )<br/> <b>139 results screened</b><br/> <b>(10 selected)</b></p> |
| <p><b>Total</b></p>                                                    | <p><b>Selected papers – 37</b></p>                                                                                                                                                                                                                                                                                                                                                                                                                                                                                                                                                                                |

**Supplementary material 1 – Search String Process**

|                                                                                     |                                                                                                                                                                                                                                                                                                                                                                                                                                                                                        |
|-------------------------------------------------------------------------------------|----------------------------------------------------------------------------------------------------------------------------------------------------------------------------------------------------------------------------------------------------------------------------------------------------------------------------------------------------------------------------------------------------------------------------------------------------------------------------------------|
| <p><b>4. Independence or failure to seek support as a risk factor for falls</b></p> | <p><b><u>AMED</u></b><br/> Palliative OR hospice OR cancer OR “end of life” OR terminal OR dying OR death AND Fall* OR Collaps* OR Trip* OR Slip* AND Independ* OR Living well OR Determination OR Frailty OR Continen* OR Incontinence OR Bathroom OR Toileting OR Elimination OR Assistance OR “Nurse call” OR “Strong willed” OR Unrealistic OR Self-Reliant<br/> <b>43 results screened</b><br/> <b>(8 selected)</b></p>                                                           |
|                                                                                     | <p><b><u>Health Research Premium Collection</u></b><br/> ti(Palliative OR hospice OR "end of life" OR terminal OR dying OR death) AND ti(Fall* OR Collaps* OR Trip* OR Slip*) AND ab(Independ* OR Living well OR Determination OR Frailty OR Continen* OR Incontinence OR Bathroom OR Toileting OR Elimination OR Assistance OR "Nurse call" OR "Strong willed" OR Unrealistic OR Self-Reliant)<br/> <b>93 results screened</b><br/> <b>(4 selected)</b></p>                           |
|                                                                                     | <p><b><u>CINAHL</u></b><br/> TI ( Fall* OR Collaps* OR Trip* OR Slip* OR Accident OR safety OR Incident ) AND TI ( Palliative OR hospice OR cancer OR “end of life” OR terminal OR dying OR death ) AND AB ( Independ* OR Living well OR Determination OR Frailty OR Continen* OR Incontinence OR Bathroom OR Toileting OR Elimination OR Assistance OR “Nurse call” OR “Strong willed” OR Unrealistic OR Self-Reliant )<br/> <b>345 results screened</b><br/> <b>(9 selected)</b></p> |
| <p><b>Total</b></p>                                                                 | <p><b>Selected papers – 21</b></p>                                                                                                                                                                                                                                                                                                                                                                                                                                                     |
| <p><b>Total of all four themes</b></p>                                              | <p><b>Records screened - 2540</b><br/> <b>Total once duplicates removed – 130</b></p>                                                                                                                                                                                                                                                                                                                                                                                                  |

**Supplementary material 1 – Search String Process**
